# Supplementary material for: A γ-Secretase Inhibitor Attenuates Cell Cycle Progression and Invasion in Human Oral Squamous Cell Carcinoma: An In Vitro Study
Source: MDPI journal article supplement (doi:10.3390/ijms23168869), 2022-08-09
Supplement: s1 [file s1]

## Supplementary Materials

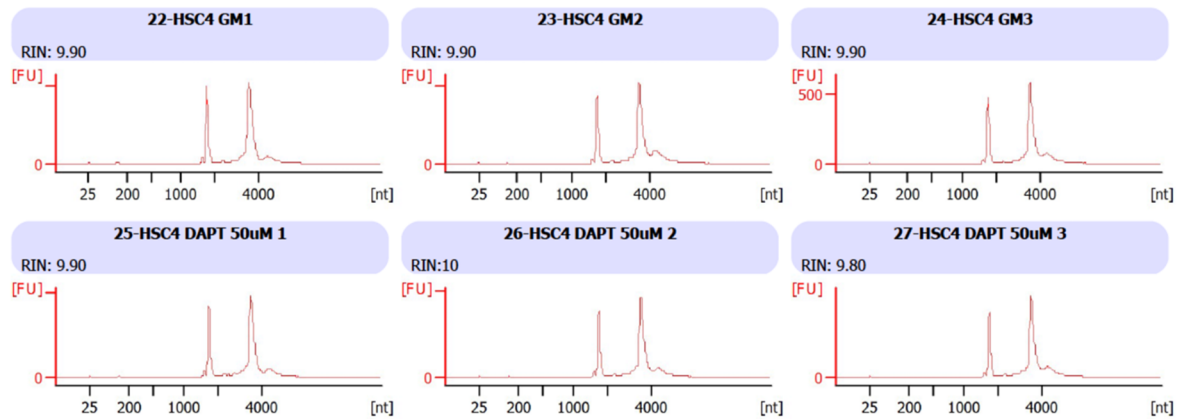

**Figure S1:** Bioanalyzer traces of submitted total RNA samples.

Breast cancer cells (MDA-MB-468 adenocarcinoma)

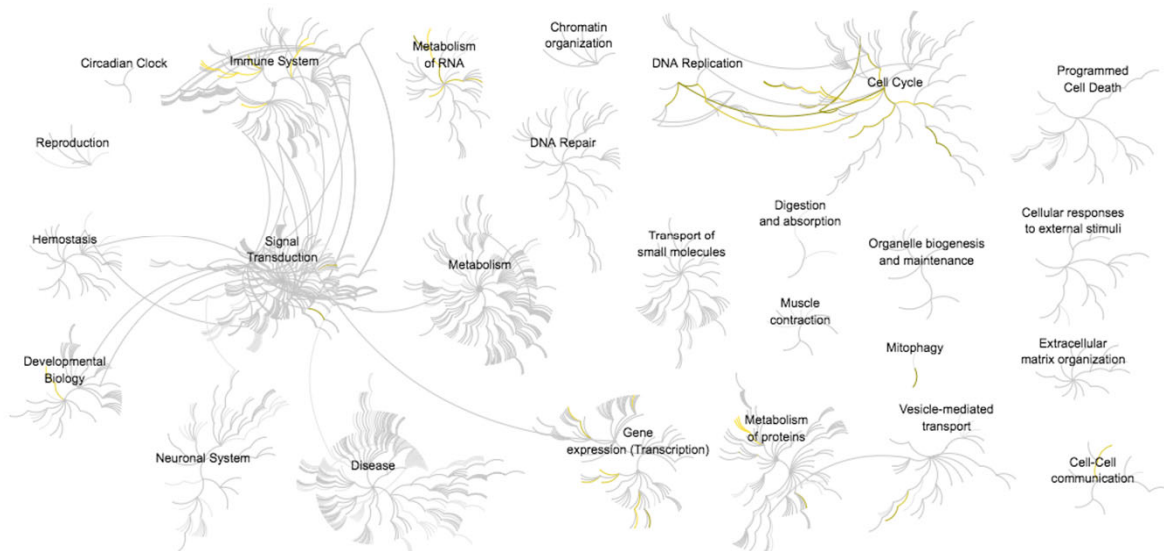

**Figure S2:** Publicly available dataset of a breast cancer cell line treated with a Notch inhibitor (GSE82298) was downloaded and analysed. Yellow highlights in the diagram shows the dysregulated Reactome pathways in the breast cancer treated with Notch inhibitor.

KrasG12V-driven non-small cell lung carcinoma

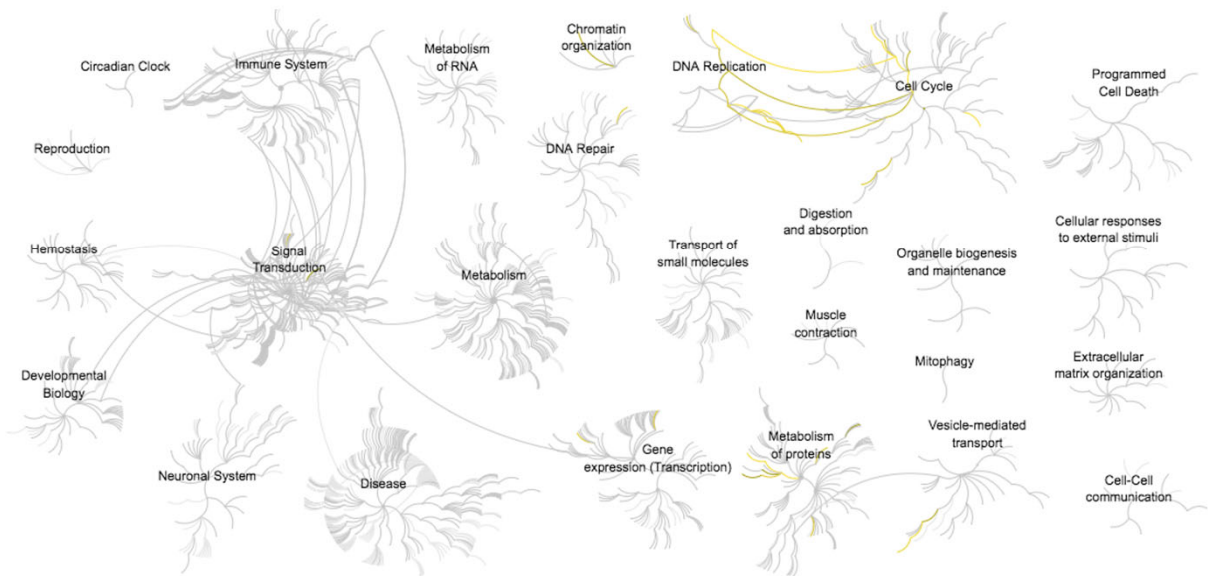

**Figure S3:** Publicly available dataset of lung cancer cells treated with a Notch inhibitor (GSE38054) were downloaded and analysed. Yellow highlights in the diagram showed the dysregulated Reactome pathways in lung cancer treated with Notch inhibitor.

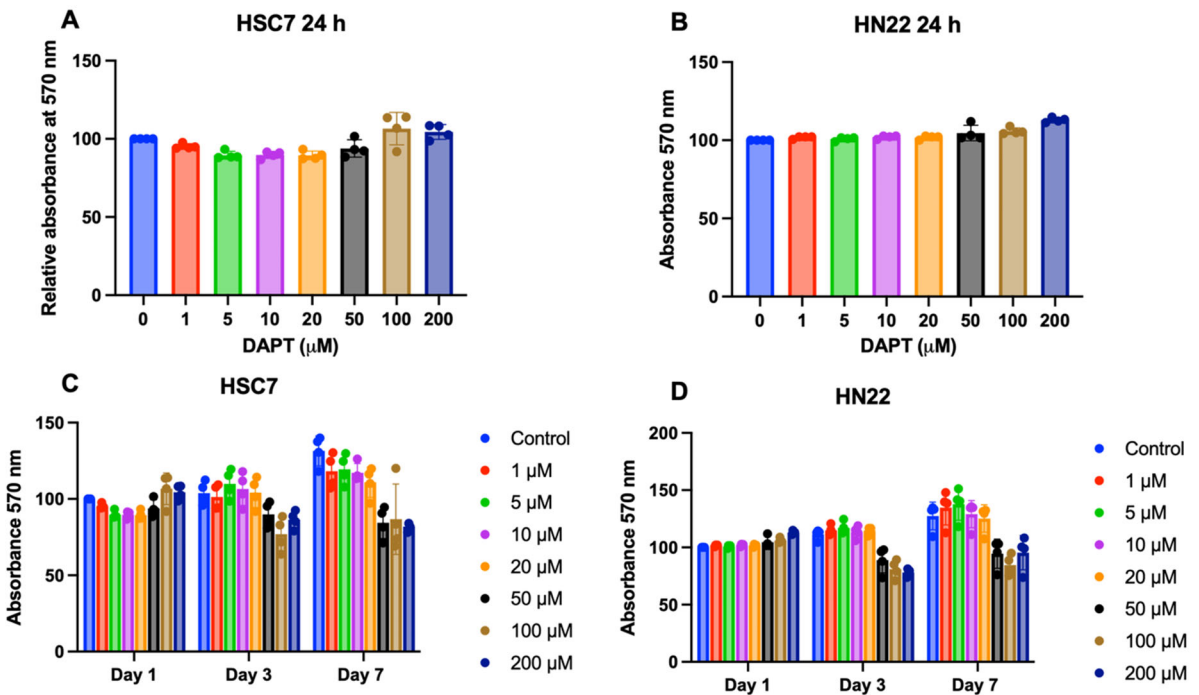

**Figure S4:** DAPT attenuated HSC-7 and HN22 cell proliferation. Cells were treated with DAPT. DMSO was used as the vehicle control. (A and B) Cell cytotoxicity was evaluated at 24 h using MTT assay. (C and D) Cell proliferation was determined using an MTT assay.

**Table S1:** Primer sequences.

| Gene         | Sequences                                 | Accession number |
|--------------|-------------------------------------------|------------------|
| <i>CCND1</i> | F: 5'-GGCGGAG GAGAACAAACAGA-3'            | NM_053056.3      |
|              | R: 5'-A TGGAGGGCGGATTGGAAA-3'             |                  |
| <i>CCNE2</i> | F: 5'-GCCGAGCGGTAGCTGGTC-3'               | NM_057749.2      |
|              | R: 5'-GGGCTGCTGCTTAGCTTGTA-3'             |                  |
| <i>E2F1</i>  | F: 5' -GAC CCT GAC CTG CTG CTC T- 3'      | NM_005225.3      |
|              | R: 5' - GGC CAG GTA CTG ATG GTC A-3'      |                  |
| <i>E2F2</i>  | F: 5' -CAA GTT GTG CGA TGC CTG- 3'        | NM_004091.4      |
|              | R: 5' - TTG GGA ACT CAG GGA CGA -3'       |                  |
| <i>MCM2</i>  | F: 5' - AAT TTC GTC CTG GGT CCT TT -3'    | NM_004526.4      |
|              | R: 5' - CAC TTT GCC TGG ACT CTC CT-3'     |                  |
| <i>MCM4</i>  | F: 5' - TTC TTT GAC CGT TAC CCT GA-3'     | NM_005914.4      |
|              | R: 5' - ACA CTT GGC ACT GGA AGA AG-3'     |                  |
| <i>MCM5</i>  | F: 5' - TAT TGC CTA CTG CCG AGT GA-3'     | NM_006739.4      |
|              | R: 5' - ACT GTC CCT CTC GTG CTG AC-3'     |                  |
| <i>MCM8</i>  | F: 5' - CCA GGC CTA GGA AAA AGT CA-3'     | NM_032485.6      |
|              | R: 5' - GAG GTG GTC GTG GTG TTA CC-3'     |                  |
| <i>MCM10</i> | F: 5' - CCG TCT GCA AAA ATC CCC TGA GA-3' | NM_018518.5      |
|              | R: 5' - ATG AGC TTT TGG GAT CTG GAG GT-3' |                  |
| <i>MMP9</i>  | F: 5'- TTT GAC AGC GAC AAG AAG TG-3'      | NM_004994.3      |
|              | R: 5'- CAG GGC GAG GAC CAT AGA GG-3'      |                  |
| <i>TIMP1</i> | F: 5'- AGTCAACCAGACCACCTTATACCA-3'        | NM_003254.3      |
|              | R: 5'- TTTCAGAGCCTTGGAGGAGCTGGTC-3'       |                  |
| <i>18S</i>   | F: 5' - GGCGTCCCCCAACTTCTTA -3'           | NR_003286.2      |
|              | R: 5' - GGGCATCACAGACCTGTTATT-3'          |                  |

**Table S2:** KEGG pathway enrichment analysis of differentially expressed genes in a g-secretase inhibitor-treated human oral squamous cell carcinoma cell line.

| Pathway                                              | Total genes | Hits genes | FDR      |
|------------------------------------------------------|-------------|------------|----------|
| Cell cycle                                           | 124         | 53         | 2.56E-09 |
| DNA replication                                      | 36          | 22         | 4.71E-07 |
| Ribosome                                             | 153         | 55         | 8.18E-07 |
| p53 signaling pathway                                | 72          | 30         | 4.43E-05 |
| Protein processing in endoplasmic reticulum          | 165         | 51         | 0.000337 |
| HTLV-I infection                                     | 219         | 63         | 0.000337 |
| Cellular senescence                                  | 160         | 48         | 0.00111  |
| Prostate cancer                                      | 97          | 32         | 0.00298  |
| Mismatch repair                                      | 23          | 12         | 0.00393  |
| Fluid shear stress and atherosclerosis               | 139         | 41         | 0.0045   |
| Lysosome                                             | 123         | 37         | 0.0055   |
| Antifolate resistance                                | 31          | 14         | 0.00558  |
| Parkinson's disease                                  | 142         | 41         | 0.00558  |
| Pathways in cancer                                   | 530         | 120        | 0.00558  |
| Carbon metabolism                                    | 116         | 35         | 0.00558  |
| AGE-RAGE signaling pathway in diabetic complications | 100         | 31         | 0.00659  |
| Nucleotide excision repair                           | 47          | 18         | 0.00659  |
| Biosynthesis of amino acids                          | 75          | 25         | 0.00659  |
| Epstein-Barr virus infection                         | 201         | 53         | 0.00666  |
| Small cell lung cancer                               | 93          | 29         | 0.00752  |
| Viral carcinogenesis                                 | 201         | 52         | 0.011    |
| HIF-1 signaling pathway                              | 100         | 30         | 0.0113   |
| Pathogenic Escherichia coli infection                | 55          | 19         | 0.0154   |
| Chronic myeloid leukemia                             | 76          | 24         | 0.0154   |
| Base excision repair                                 | 33          | 13         | 0.0222   |
| Pyrimidine metabolism                                | 57          | 19         | 0.0223   |
| Pancreatic cancer                                    | 75          | 23         | 0.0246   |
| Proteoglycans in cancer                              | 201         | 50         | 0.0246   |
| Fanconi anemia pathway                               | 54          | 18         | 0.0246   |
| SNARE interactions in vesicular transport            | 34          | 13         | 0.0246   |
| Hepatitis B                                          | 163         | 42         | 0.0246   |
| Thyroid hormone signaling pathway                    | 116         | 32         | 0.0246   |
| Renal cell carcinoma                                 | 69          | 21         | 0.0365   |
| Necroptosis                                          | 162         | 41         | 0.0365   |

**Table S3:** Reactome pathway enrichment analysis of differentially expressed genes in a g-secretase inhibitor-treated human oral squamous cell carcinoma cell line.

| Pathway                                                       | Total genes | Hits genes | FDR      |
|---------------------------------------------------------------|-------------|------------|----------|
| Cell Cycle, Mitotic                                           | 411         | 135        | 5.25E-12 |
| S Phase                                                       | 122         | 57         | 3.35E-11 |
| DNA strand elongation                                         | 31          | 24         | 1.51E-10 |
| Cell Cycle                                                    | 508         | 152        | 1.51E-10 |
| Synthesis of DNA                                              | 95          | 47         | 1.69E-10 |
| DNA Replication                                               | 102         | 49         | 1.87E-10 |
| G1/S Transition                                               | 113         | 50         | 4.43E-09 |
| Mitotic G1-G1/S phases                                        | 140         | 57         | 9.18E-09 |
| Mitotic M-M/G1 phases                                         | 266         | 89         | 1.37E-08 |
| Extension of Telomeres                                        | 24          | 18         | 1.33E-07 |
| Telomere C-strand (Lagging Strand) Synthesis                  | 22          | 17         | 1.64E-07 |
| Lagging Strand Synthesis                                      | 20          | 15         | 2.98E-06 |
| Cell Cycle Checkpoints                                        | 131         | 48         | 1.04E-05 |
| M Phase                                                       | 233         | 71         | 5.16E-05 |
| Gap-filling DNA repair synthesis and ligation in GG-NER       | 16          | 12         | 6.11E-05 |
| Gap-filling DNA repair synthesis and ligation in TC-NER       | 16          | 12         | 6.11E-05 |
| G2/M Checkpoints                                              | 48          | 23         | 8.93E-05 |
| DNA Replication Pre-Initiation                                | 80          | 32         | 0.000109 |
| M/G1 Transition                                               | 80          | 32         | 0.000109 |
| Processive synthesis on the lagging strand                    | 15          | 11         | 0.000193 |
| Repair synthesis of patch ~27-30 bases long by DNA polymerase | 15          | 11         | 0.000193 |
| Repair synthesis for gap-filling by DNA polymerase in TC-NER  | 15          | 11         | 0.000193 |
| Activation of ATR in response to replication stress           | 41          | 20         | 0.000235 |
| Activation of the pre-replicative complex                     | 32          | 17         | 0.000275 |
| Unwinding of DNA                                              | 11          | 9          | 0.000318 |
| Unfolded Protein Response                                     | 66          | 27         | 0.000318 |
| G1/S-Specific Transcription                                   | 16          | 11         | 0.000424 |
| Metabolism of proteins                                        | 689         | 162        | 0.000565 |
| Removal of the Flap Intermediate                              | 14          | 10         | 0.000565 |
| Leading Strand Synthesis                                      | 14          | 10         | 0.000565 |
| Polymerase switching                                          | 14          | 10         | 0.000565 |
| Polymerase switching on the C-strand of the telomere          | 14          | 10         | 0.000565 |
| Cyclin E associated events during G1/S transition             | 65          | 26         | 0.000602 |
| E2F mediated regulation of DNA replication                    | 35          | 17         | 0.000917 |

| Pathway                                                                                                | Total genes | Hits genes | FDR     |
|--------------------------------------------------------------------------------------------------------|-------------|------------|---------|
| Removal of licensing factors from origins                                                              | 71          | 27         | 0.00112 |
| Regulation of DNA replication                                                                          | 71          | 27         | 0.00112 |
| Mitotic Prometaphase                                                                                   | 127         | 41         | 0.00116 |
| Ribosomal scanning and start codon recognition                                                         | 91          | 32         | 0.00128 |
| G0 and Early G1                                                                                        | 27          | 14         | 0.00159 |
| Antiviral mechanism by IFN-stimulated genes                                                            | 69          | 26         | 0.00159 |
| ISG15 antiviral mechanism                                                                              | 69          | 26         | 0.00159 |
| Switching of origins to a post-replicative state                                                       | 69          | 26         | 0.00159 |
| Orc1 removal from chromatin                                                                            | 69          | 26         | 0.00159 |
| Separation of Sister Chromatids                                                                        | 186         | 54         | 0.00173 |
| Cyclin A:Cdk2-associated events at S phase entry                                                       | 66          | 25         | 0.00191 |
| Processive synthesis on the C-strand of the telomere                                                   | 11          | 8          | 0.00255 |
| Antigen Presentation: Folding, assembly and peptide loading of class I MHC                             | 25          | 13         | 0.00255 |
| Mitotic Anaphase                                                                                       | 198         | 56         | 0.00256 |
| Mitotic Metaphase and Anaphase                                                                         | 199         | 56         | 0.00292 |
| Telomere Maintenance                                                                                   | 72          | 26         | 0.00314 |
| Translation initiation complex formation                                                               | 92          | 31         | 0.00317 |
| DNA Repair                                                                                             | 117         | 37         | 0.00324 |
| Folding of actin by CCT/TriC                                                                           | 9           | 7          | 0.00334 |
| GTP hydrolysis and joining of the 60S ribosomal subunit                                                | 201         | 56         | 0.00355 |
| Activation of the mRNA upon binding of the cap-binding complex and eIFs, and subsequent binding to 43S | 93          | 31         | 0.00366 |
| Resolution of Sister Chromatid Cohesion                                                                | 118         | 37         | 0.00366 |
| Formation of tubulin folding intermediates by CCT/TriC                                                 | 23          | 12         | 0.0038  |
| SCF(Skp2)-mediated degradation of p27/p21                                                              | 58          | 22         | 0.00395 |
| Metabolism of RNA                                                                                      | 339         | 85         | 0.00436 |
| Formation of the ternary complex, and subsequently, the 43S complex                                    | 83          | 28         | 0.00556 |
| 3' -UTR-mediated translational regulation                                                              | 201         | 55         | 0.00588 |
| L13a-mediated translational silencing of Ceruloplasmin expression                                      | 201         | 55         | 0.00588 |
| Activation of Chaperones by IRE1alpha                                                                  | 49          | 19         | 0.00721 |
| Removal of the Flap Intermediate from the C-strand                                                     | 10          | 7          | 0.00783 |

| Pathway                                                                                   | Total genes | Hits genes | FDR     |
|-------------------------------------------------------------------------------------------|-------------|------------|---------|
| Metabolism of nucleotides                                                                 | 81          | 27         | 0.00821 |
| Eukaryotic Translation Initiation                                                         | 209         | 56         | 0.00859 |
| Cap-dependent Translation Initiation                                                      | 209         | 56         | 0.00859 |
| Interferon Signaling                                                                      | 173         | 48         | 0.00921 |
| Assembly of collagen fibrils and other multimeric structures                              | 54          | 20         | 0.00941 |
| G1/S DNA Damage Checkpoints                                                               | 62          | 22         | 0.00984 |
| Global Genomic NER (GG-NER)                                                               | 36          | 15         | 0.011   |
| Chaperonin-mediated protein folding                                                       | 51          | 19         | 0.0114  |
| Formation of a pool of free 40S subunits                                                  | 189         | 51         | 0.0118  |
| Assembly of the pre-replicative complex                                                   | 63          | 22         | 0.012   |
| DNA replication initiation                                                                | 6           | 5          | 0.0151  |
| Telomere C-strand synthesis initiation                                                    | 6           | 5          | 0.0151  |
| Cooperation of Prefoldin and TriC/CCT in actin and tubulin folding                        | 30          | 13         | 0.0151  |
| APC/C-mediated degradation of cell cycle proteins                                         | 89          | 28         | 0.0152  |
| Regulation of mitotic cell cycle                                                          | 89          | 28         | 0.0152  |
| Phosphorylation of proteins involved in G1/S transition by active Cyclin E:Cdk2 complexes | 4           | 4          | 0.0162  |
| Cytosolic tRNA aminoacylation                                                             | 24          | 11         | 0.0206  |
| Cytokine Signaling in Immune system                                                       | 286         | 70         | 0.0232  |
| Gluconeogenesis                                                                           | 35          | 14         | 0.0232  |
| Metabolism of mRNA                                                                        | 317         | 76         | 0.0267  |
| p53-Dependent G1/S DNA damage checkpoint                                                  | 59          | 20         | 0.0273  |
| p53-Dependent G1 DNA Damage Response                                                      | 59          | 20         | 0.0273  |
| Type I hemidesmosome assembly                                                             | 12          | 7          | 0.0274  |
| Chromosome Maintenance                                                                    | 124         | 35         | 0.0294  |
| Association of TriC/CCT with target proteins during biosynthesis                          | 29          | 12         | 0.033   |
| Prefoldin mediated transfer of substrate to CCT/TriC                                      | 29          | 12         | 0.033   |
| Protein folding                                                                           | 56          | 19         | 0.033   |
| Activation of APC/C and APC/C:Cdc20 mediated degradation of mitotic proteins              | 77          | 24         | 0.0342  |
| Activation of NIMA Kinases NEK9, NEK6, NEK7                                               | 7           | 5          | 0.0373  |
| Nucleotide Excision Repair                                                                | 53          | 18         | 0.0408  |
| Glucose metabolism                                                                        | 70          | 22         | 0.0443  |
| Metabolism of folate and pterines                                                         | 10          | 6          | 0.0453  |

**Table S4:** Gene ontology (Biological process) enrichment analysis of differentially expressed genes in a g-secretase inhibitor-treated human oral squamous cell carcinoma cell line.

| Pathway                                         | Total genes | Hits genes | FDR      |
|-------------------------------------------------|-------------|------------|----------|
| S phase                                         | 153         | 72         | 3.35E-15 |
| S phase of mitotic cell cycle                   | 144         | 67         | 5.07E-14 |
| Viral reproductive process                      | 597         | 176        | 1.82E-12 |
| Interphase                                      | 443         | 136        | 6.86E-11 |
| Interphase of mitotic cell cycle                | 435         | 133        | 1.41E-10 |
| Mitotic cell cycle                              | 968         | 246        | 4.05E-10 |
| Cellular component disassembly                  | 310         | 102        | 4.05E-10 |
| Protein complex disassembly                     | 167         | 62         | 2.63E-08 |
| Viral reproduction                              | 803         | 204        | 2.63E-08 |
| Cellular protein complex disassembly            | 160         | 60         | 2.80E-08 |
| G1/S transition of mitotic cell cycle           | 209         | 72         | 3.72E-08 |
| Macromolecular complex disassembly              | 189         | 67         | 3.72E-08 |
| Cell cycle arrest                               | 428         | 122        | 6.92E-08 |
| Cell cycle phase                                | 1070        | 255        | 1.12E-07 |
| Viral infectious cycle                          | 241         | 78         | 1.56E-07 |
| Regulation of cell cycle                        | 886         | 216        | 1.98E-07 |
| Regulation of mitotic cell cycle                | 351         | 103        | 1.98E-07 |
| Cell cycle checkpoint                           | 281         | 86         | 4.14E-07 |
| Translational initiation                        | 205         | 68         | 4.14E-07 |
| ER_nucleus signaling pathway                    | 111         | 44         | 4.41E-07 |
| DNA_dependent DNA replication                   | 121         | 46         | 9.15E-07 |
| Negative regulation of cell cycle               | 520         | 135        | 3.11E-06 |
| Intracellular protein transport                 | 793         | 191        | 3.11E-06 |
| Protein targeting to membrane                   | 158         | 54         | 3.52E-06 |
| Endoplasmic reticulum unfolded protein response | 93          | 37         | 4.58E-06 |
| Cell division                                   | 507         | 130        | 1.01E-05 |
| Mitotic cell cycle checkpoint                   | 149         | 50         | 1.73E-05 |
| Mitosis                                         | 420         | 110        | 2.54E-05 |
| DNA replication initiation                      | 30          | 17         | 2.71E-05 |
| Interaction with host                           | 426         | 111        | 2.77E-05 |
| DNA replication                                 | 346         | 93         | 4.89E-05 |
| Cell cycle process                              | 1420        | 304        | 5.00E-05 |
| M phase of mitotic cell cycle                   | 447         | 114        | 5.58E-05 |
| Positive regulation of cell cycle               | 113         | 39         | 0.000108 |
| RNA catabolic process                           | 256         | 72         | 0.000112 |
| Cellular macromolecule catabolic process        | 849         | 193        | 0.000113 |
| Cell cycle                                      | 1860        | 383        | 0.000146 |
| Sister chromatid segregation                    | 57          | 24         | 0.000146 |
| Cellular response to stress                     | 1620        | 339        | 0.000165 |
| Response to ionizing radiation                  | 112         | 37         | 0.00049  |
| Spindle organization                            | 92          | 32         | 0.000525 |
| Mitotic sister chromatid segregation            | 54          | 22         | 0.000589 |
| DNA integrity checkpoint                        | 152         | 46         | 0.000634 |



| Pathway                                                                 | Total genes | Hits genes | FDR      |
|-------------------------------------------------------------------------|-------------|------------|----------|
| Chromosome segregation                                                  | 174         | 51         | 0.000634 |
| Intrinsic apoptotic signaling pathway                                   | 135         | 42         | 0.000651 |
| Macromolecule catabolic process                                         | 1070        | 230        | 0.000697 |
| Macromolecule catabolic process                                         | 1070        | 230        | 0.000697 |
| Negative regulation of apoptotic process                                | 679         | 154        | 0.000855 |
| Negative regulation of apoptotic process                                | 679         | 154        | 0.000855 |
| Androgen receptor signaling pathway                                     | 67          | 25         | 0.000855 |
| Negative regulation of programmed cell death                            | 691         | 155        | 0.00141  |
| DNA damage checkpoint                                                   | 143         | 42         | 0.00242  |
| Protein targeting                                                       | 545         | 125        | 0.00245  |
| DNA repair                                                              | 538         | 123        | 0.00311  |
| G1 phase                                                                | 49          | 19         | 0.00337  |
| Signal transduction in response to DNA damage                           | 129         | 38         | 0.00424  |
| Response to hypoxia                                                     | 245         | 63         | 0.00448  |
| Organelle localization                                                  | 189         | 51         | 0.00472  |
| Protein folding                                                         | 241         | 62         | 0.00475  |
| DNA damage response, signal transduction by p53 class mediator          | 117         | 35         | 0.0049   |
| Intracellular steroid hormone receptor signaling pathway                | 113         | 34         | 0.00516  |
| G1 phase of mitotic cell cycle                                          | 47          | 18         | 0.00519  |
| M phase                                                                 | 671         | 147        | 0.00526  |
| Negative regulation of transcription from RNA polymerase II promoter    | 552         | 124        | 0.00526  |
| G2/M transition of mitotic cell cycle                                   | 150         | 42         | 0.00596  |
| Aging                                                                   | 197         | 52         | 0.00646  |
| Response to abiotic stimulus                                            | 876         | 185        | 0.00685  |
| Response to DNA damage stimulus                                         | 862         | 182        | 0.00756  |
| DNA recombination                                                       | 247         | 62         | 0.00812  |
| Chromosome condensation                                                 | 34          | 14         | 0.0085   |
| Intracellular transport                                                 | 1510        | 301        | 0.0085   |
| Cellular component disassembly involved in execution phase of apoptosis | 78          | 25         | 0.00901  |
| Chromosome organization                                                 | 878         | 184        | 0.00958  |
| Golgi vesicle transport                                                 | 206         | 53         | 0.0098   |
| Regulation of hydrolase activity                                        | 843         | 177        | 0.0105   |
| Positive regulation of binding                                          | 79          | 25         | 0.0105   |
| Apoptotic signaling pathway                                             | 261         | 64         | 0.0115   |
| Regulation of binding                                                   | 189         | 49         | 0.0119   |
| Establishment of organelle localization                                 | 125         | 35         | 0.0139   |
| Response to oxidative stress                                            | 279         | 67         | 0.0153   |
| Protein export from nucleus                                             | 48          | 17         | 0.0158   |
| Regulation of mitosis                                                   | 99          | 29         | 0.0158   |
| Neuron apoptotic process                                                | 169         | 44         | 0.0178   |

| Pathway                                                                                   | Total genes | Hits genes | FDR    |
|-------------------------------------------------------------------------------------------|-------------|------------|--------|
| Positive regulation of cysteine_type endopeptidase activity involved in apoptotic process | 118         | 33         | 0.0181 |
| Body fluid secretion                                                                      | 74          | 23         | 0.0192 |
| Base_excision repair                                                                      | 45          | 16         | 0.0195 |
| Negative regulation of protein metabolic process                                          | 540         | 117        | 0.0216 |
| Regulation of neuron apoptotic process                                                    | 150         | 39         | 0.0299 |
| Positive regulation of I_kappaB kinase/NF_kappaB cascade                                  | 150         | 39         | 0.0299 |
| Intrinsic apoptotic signaling pathway in response to DNA damage                           | 51          | 17         | 0.03   |
| Macromolecular complex assembly                                                           | 1120        | 223        | 0.0388 |
| Intra_Golgi vesicle_mediated transport                                                    | 32          | 12         | 0.0391 |
| Microtubule cytoskeleton organization                                                     | 337         | 76         | 0.0395 |
| Protein homooligomerization                                                               | 226         | 54         | 0.0395 |
| Apoptotic mitochondrial changes                                                           | 83          | 24         | 0.0398 |
| Regulation of organelle organization                                                      | 589         | 124        | 0.0413 |
| Nuclear export                                                                            | 139         | 36         | 0.0413 |
| Gland development                                                                         | 303         | 69         | 0.043  |
| Response to toxin                                                                         | 130         | 34         | 0.043  |
| Protein catabolic process                                                                 | 644         | 134        | 0.0437 |
| Regulation of translation                                                                 | 228         | 54         | 0.0445 |
| Response to radiation                                                                     | 345         | 77         | 0.0451 |
| Regulation of cyclin_dependent protein kinase activity                                    | 89          | 25         | 0.0465 |
| Positive regulation of hydrolase activity                                                 | 497         | 106        | 0.0465 |
| Protein transport                                                                         | 1400        | 272        | 0.0473 |
| Regulation of chromosome organization                                                     | 122         | 32         | 0.0482 |
| Nucleocytoplasmic transport                                                               | 388         | 85         | 0.0482 |
| Regulation of I_kappaB kinase/NF_kappaB cascade                                           | 210         | 50         | 0.05   |

**Table S5:** Gene ontology (Cellular Component) enrichment analysis of differentially expressed genes in a g-secretase inhibitor-treated human oral squamous cell carcinoma cell line.

| Pathway                                      | Total genes | Hits genes | FDR      |
|----------------------------------------------|-------------|------------|----------|
| Cytosol                                      | 2660        | 592        | 1.93E-19 |
| Ribosomal subunit                            | 154         | 56         | 3.89E-08 |
| Ribonucleoprotein complex                    | 681         | 164        | 5.12E-07 |
| Nucleoplasm                                  | 1820        | 371        | 1.53E-06 |
| Nuclear lumen                                | 2690        | 521        | 1.59E-06 |
| Cytosolic part                               | 204         | 63         | 1.59E-06 |
| Membrane_enclosed lumen                      | 3440        | 648        | 1.59E-06 |
| Organelle lumen                              | 3380        | 637        | 1.87E-06 |
| Chromosome                                   | 784         | 178        | 3.50E-06 |
| Condensed chromosome                         | 193         | 59         | 4.08E-06 |
| Spindle                                      | 261         | 72         | 1.56E-05 |
| Nuclear chromosome                           | 320         | 84         | 1.74E-05 |
| Nuclear chromosome part                      | 273         | 72         | 7.17E-05 |
| Ribosome                                     | 249         | 67         | 7.17E-05 |
| Chromosomal part                             | 670         | 149        | 7.17E-05 |
| Microtubule organizing center                | 543         | 125        | 7.17E-05 |
| Nucleolus                                    | 652         | 145        | 8.92E-05 |
| Centrosome                                   | 412         | 99         | 9.36E-05 |
| Small ribosomal subunit                      | 72          | 26         | 0.000243 |
| Chromatin                                    | 326         | 80         | 0.000278 |
| PML body                                     | 77          | 27         | 0.000278 |
| Nuclear part                                 | 3330        | 604        | 0.000278 |
| Replication fork                             | 50          | 20         | 0.000327 |
| Nuclear membrane                             | 207         | 55         | 0.000435 |
| Macromolecular complex                       | 4800        | 842        | 0.000442 |
| Perinuclear region of cytoplasm              | 475         | 105        | 0.00134  |
| Non_membrane_bounded organelle               | 3940        | 696        | 0.00134  |
| Intracellular non_membrane_bounded organelle | 3940        | 696        | 0.00134  |
| Nuclear envelope                             | 387         | 88         | 0.00148  |
| Nuclear body                                 | 295         | 70         | 0.00172  |
| Nucleoplasm part                             | 910         | 182        | 0.0022   |
| Nuclear chromatin                            | 159         | 42         | 0.00279  |
| Cell cortex                                  | 195         | 48         | 0.00612  |
| Chromosome, centromeric region               | 198         | 48         | 0.00842  |
| Microtubule cytoskeleton                     | 1120        | 213        | 0.00927  |
| Microtubule                                  | 352         | 77         | 0.00939  |
| Spindle pole                                 | 101         | 28         | 0.00965  |
| Organelle outer membrane                     | 156         | 39         | 0.0113   |
| Pore complex                                 | 103         | 28         | 0.0124   |
| U12_type spliceosomal complex                | 24          | 10         | 0.0124   |
| Nuclear replication fork                     | 28          | 11         | 0.0129   |
| Outer membrane                               | 163         | 40         | 0.013    |
| Microtubule organizing center part           | 100         | 27         | 0.015    |
| Transcription factor complex                 | 303         | 66         | 0.0178   |

| Pathway                                                       | Total genes | Hits genes | FDR    |
|---------------------------------------------------------------|-------------|------------|--------|
| Integral to endoplasmic reticulum membrane                    | 118         | 30         | 0.0226 |
| Mitochondrial outer membrane                                  | 133         | 33         | 0.0226 |
| Spindle microtubule                                           | 43          | 14         | 0.0234 |
| Protein complex                                               | 4050        | 693        | 0.0238 |
| Golgi membrane                                                | 605         | 119        | 0.0255 |
| Tight junction                                                | 105         | 27         | 0.0267 |
| Endoplasmic reticulum membrane                                | 872         | 165        | 0.0275 |
| Nuclear pore                                                  | 86          | 23         | 0.0277 |
| Nuclear matrix                                                | 87          | 23         | 0.0316 |
| Condensed nuclear chromosome                                  | 73          | 20         | 0.0333 |
| Apical junction complex                                       | 123         | 30         | 0.0354 |
| Kinetochore                                                   | 149         | 35         | 0.0361 |
| Spliceosomal complex                                          | 161         | 37         | 0.0417 |
| Eukaryotic translation initiation factor 3 complex            | 17          | 7          | 0.0426 |
| Nuclear outer membrane_endoplasmic reticulum membrane network | 894         | 166        | 0.0469 |

**Table S6:** Gene ontology (Molecular Function) enrichment analysis of differentially expressed genes in a g-secretase inhibitor-treated human oral squamous cell carcinoma cell line.

| Pathway                                | Total genes | Hits genes | FDR      |
|----------------------------------------|-------------|------------|----------|
| Structural constituent of ribosome     | 167         | 58         | 1.47E-06 |
| RNA binding                            | 976         | 205        | 0.00434  |
| Damaged DNA binding                    | 46          | 19         | 0.00434  |
| Chromatin binding                      | 338         | 83         | 0.00434  |
| Enzyme binding                         | 1200        | 244        | 0.00434  |
| Protein C_terminus binding             | 160         | 44         | 0.0136   |
| DNA_dependent ATPase activity          | 80          | 26         | 0.014    |
| Structural constituent of cytoskeleton | 78          | 25         | 0.0202   |
| Nucleotide binding                     | 2470        | 458        | 0.0216   |
| Kinase binding                         | 418         | 93         | 0.0288   |
| ATP_dependent DNA helicase activity    | 36          | 14         | 0.0297   |
| ATP binding                            | 1490        | 285        | 0.0297   |
| Single_stranded DNA binding            | 65          | 21         | 0.0297   |
| Adenyl ribonucleotide binding          | 1530        | 291        | 0.0297   |
| Protein kinase binding                 | 376         | 84         | 0.0297   |
| Ras GTPase binding                     | 125         | 34         | 0.0305   |
| Adenyl nucleotide binding              | 1530        | 291        | 0.0305   |
| Structural molecule activity           | 666         | 137        | 0.0342   |
| Structure_specific DNA binding         | 242         | 57         | 0.0401   |
| Magnesium ion binding                  | 188         | 46         | 0.0446   |
| Steroid hormone receptor binding       | 69          | 21         | 0.0446   |
| GTPase binding                         | 150         | 38         | 0.0497   |
